# Supplementary material for: Diagnostic Performance of the Fibrosis-4 Index and Nonalcoholic Fatty Liver Disease Fibrosis Score in Lean Adults With Nonalcoholic Fatty Liver Disease
Source: PubMed Central journal article supplement (PMC10436134; doi:10.1001/jamanetworkopen.2023.29568), 2023-08-17
Supplement: jamanetwopen-e2329568-s002.pdf [file jamanetwopen-e2329568-s002.pdf]

## Data Sharing Statement

Park. Diagnostic Performance of the Fibrosis-4 Index and Nonalcoholic Fatty Liver Disease Fibrosis Score in Lean Adults With Nonalcoholic Fatty Liver Disease. *JAMA Netw Open*. Published August 17, 2023. doi:10.1001/jamanetworkopen.2023.29568

### Data

**Data available:** No
